# Supplementary material
Source: Springer Nature journal article supplement (https://www.springermedizin.de/resource/supplementary/12950_2008_94_MOESM5_ESM.pdf/9557950)

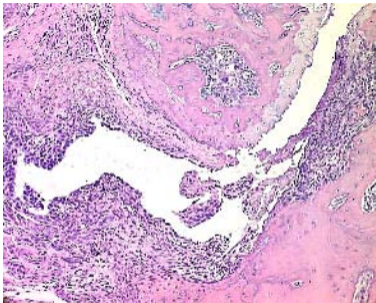

**A: Control mAb**

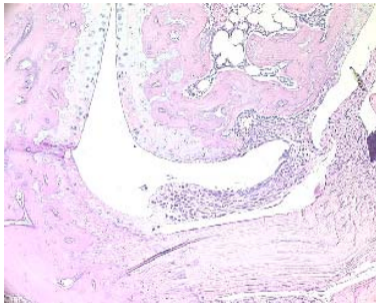

**B: Anti-IL-6 (1mg/week)**

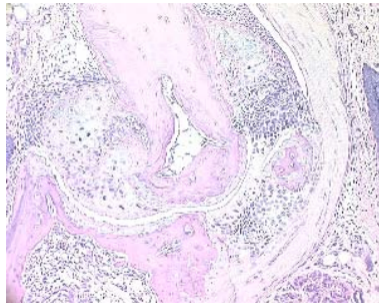

**C: Anti-IL-6 (5mg/week)**

Supplement: MOESM5 [file 9557950]
